# Supplementary material
Source: PubMed Central journal article supplement (PMC5684439)
Supplement: NIHMS916481-supplement-SuppData.pdf [file NIHMS916481-supplement-SuppData.pdf]

| Supplemental Table I: ICD-9 Definitions for Congenital Cardiac Abnormalities |                                                                 |
|------------------------------------------------------------------------------|-----------------------------------------------------------------|
| ICD-9 Code                                                                   | Description                                                     |
| 745.xx, 746.xx,<br>747.4x                                                    | All Congenital Cardiac Defects                                  |
| 745.xx                                                                       | Bulbus cordis anomalies and anomalies of cardiac septal closure |
| 746.xx                                                                       | Other congenital anomalies of heart                             |
| 747.xx                                                                       | Other congenital anomalies of circulatory system                |
| 747.0x                                                                       | Patent ductus arteriosus                                        |
| 747.1x                                                                       | Coarctation of aorta                                            |
| 747.2x                                                                       | Other anomalies of aorta                                        |
| 747.3x                                                                       | Anomalies of pulmonary artery                                   |
| 747.4x                                                                       | Anomalies of great veins                                        |
